# Supplementary material
Source: PubMed Central journal article supplement (PMC1435991)

Supplementary Figure 1.

**Comparison of the number of self-activating clones in the original and purified library.**  $\sim 1.4 \times 10^7$  and  $\sim 1.2 \times 10^7$  cells transformed with the original and purified library, respectively, were plated on a single plate containing 2 mM 3-AT and grown for 2 days at 37 °C. Approximately 7,500 colonies grew on the original library plate (top image) while only 80 colonies grew on the purified library plate (bottom image). Thus, the false positive rate at this stringency is 0.054% and 0.0007%, respectively, for the original and purified library.

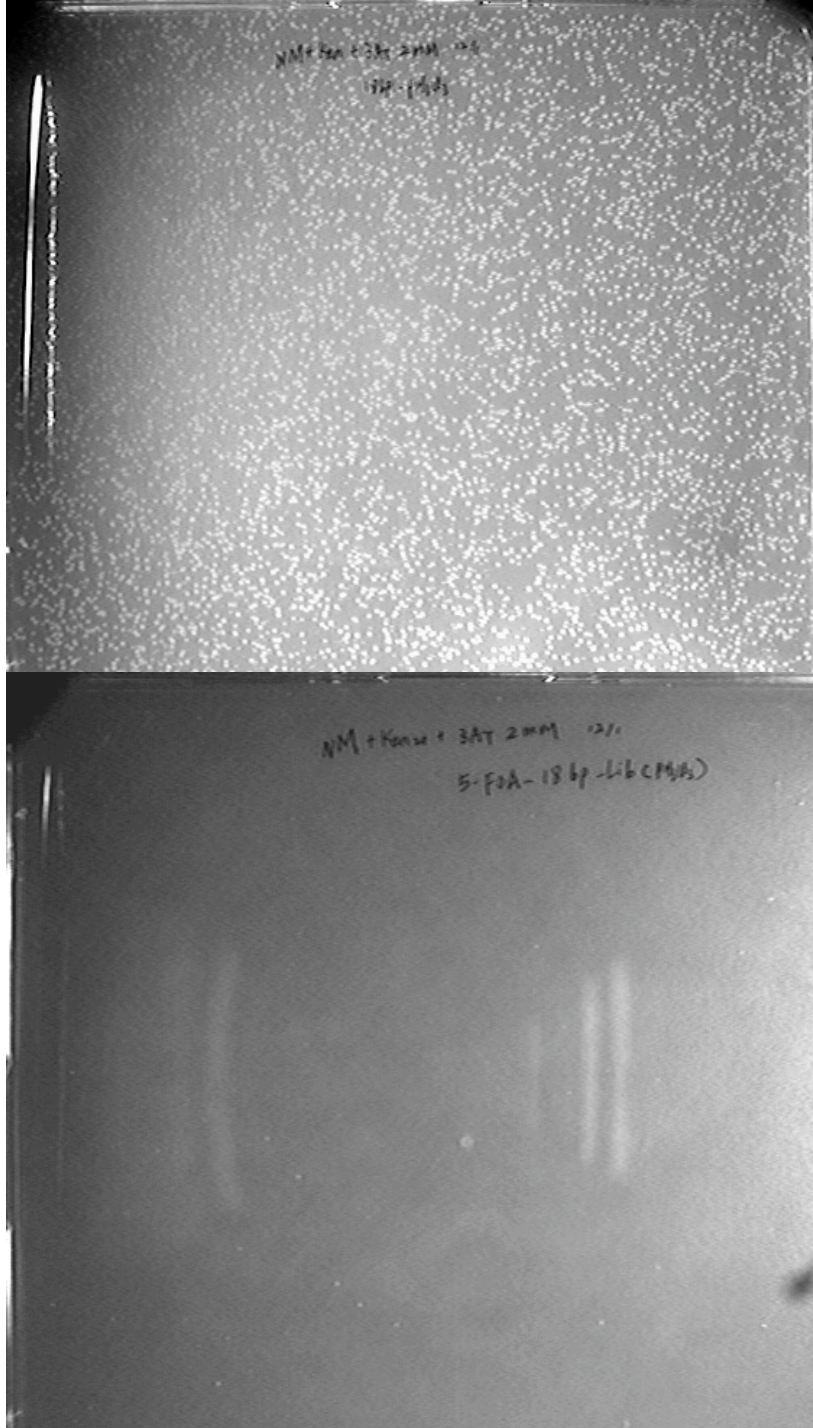

Supplement: NIHMS5491-supplement-SupFigure_1.pdf [file NIHMS5491-supplement-SupFigure_1.pdf]
