# Supplementary material
Source: PubMed Central journal article supplement (PMC1435991)
Supplement: NIHMS5491-supplement-SupTable_1.pdf [file NIHMS5491-supplement-SupTable_1.pdf]

Supplementary Table 1

Details of the selections performed with each bait using the B1H system.

| Transcription factor (bait) | Cell No. in positive screen | [3-AT] | Approx No. surviving colonies | Cell No. in negative screen* | Approx No. surviving colonies |
|-----------------------------|-----------------------------|--------|-------------------------------|------------------------------|-------------------------------|
| Zif268                      | $4 \times 10^7$             | 5 mM   | 800                           | $6 \times 10^4$              | 260                           |
| PLAG1                       | $7.6 \times 10^7$           | 3 mM   | 5,000                         | $2 \times 10^6$              | 5,000                         |
| ZnFp53                      | $1.5 \times 10^7$           | 2 mM   | 3,600                         | NA                           | NA                            |
| LAG-1                       | $1.2 \times 10^7$           | 3 mM   | 80                            | NA                           | NA                            |
| Dorsal                      | $7.8 \times 10^6$           | 2 mM   | 120                           | NA                           | NA                            |
| Runt/Bgb                    | $5 \times 10^6$             | 1 mM   | 362                           | $1.3 \times 10^4$            | 1,900                         |
| Paired                      | $1.5 \times 10^7$           | 2 mM   | 203                           | NA                           | NA                            |
| Odd                         | $1.2 \times 10^7$           | 5 mM   | 136                           | NA                           | NA                            |
| Odd                         | $1 \times 10^7$             | 2.5 mM | 600                           | NA                           | NA                            |
| Odd                         | $1 \times 10^7$             | 1.5 mM | 1,800                         | NA                           | NA                            |

\* Negative selection was carried out on YM plates with 2 mM 5-FOA.
