# Supplementary material
Source: PubMed Central journal article supplement (PMC1435991)
Supplement: NIHMS5491-supplement-SupTable_2.pdf [file NIHMS5491-supplement-SupTable_2.pdf]

## Supplementary Table 2

**Unique insert sequences from the prey isolated using the B1H system with each bait.** Bold letters indicate an overrepresented motif identified by MEME analysis. Italic letters indicate the inclusion of constant bases neighboring the randomized region to complete a binding site consistent with an overrepresented motif identified in the other sequences by MEME analysis. The E-value calculated by MEME for each identified motif is indicated. An asterisk following the sequence indicates that it is the reverse complement of the insert sequence. The absence of bold letters indicates a sequence that does not contain a binding site motif based on computational analysis. Numbers in parenthesis indicate how many times a sequence occurred among the analyzed clones.

### **Zif268 sites** (Two step selection; E-value=3.4e-020)

TTGAG**CGCGTGGGTGGAT**  
CAACGTT**TGTGTGGGCGTG** ( 2 )  
TTGCCCC**CGCGTGGGCGTC**  
    **CATACGGAAGCGGCGTGC\***  
TTGTT**TGCGTAGGCGGC**  
    AATCG**AGCGTGGGAGGGG**  
ATCGAG**GGCGTGGGTGGC**  
TGTA**GTGCGTGGGAGGG** ( 2 )  
CTAAC**CCGCGTGGGCGTA**  
CGAG**GATGCGGGGGTGTG**  
TTGCCCC**ACGTGGGCGTG**  
CGATA**ATCCGGGGCGTA**  
    GAAT**TGTGTGGGCGGCT**  
ATTT**GTAGCGTGGGCGAT**  
GAGCGA**AGCGTAGGCGTC**

**PLAG1 sites** (Motif score = 2.278 calculated by Bioprospector). The Sequence logo for PLAG1 in Figure 2 is the reverse complement of the overrepresented motifs in these sequences. 18 of 21 sequences contain the identified PLAG1 motif.

CCCC**CGAAAAGGGCCCC** ( 6 )  
CCCC**GATTTGGGGCCTC** ( 3 )  
TTCCCC**ATTTGGGCCCT** ( 4 )  
AACAC**CCCTGTGGGCCCC**  
    CCCC**CTAATGCACCCCAT**  
    CCCC**GTGGAGGCCCCAC** ( 2 )  
    CTAC**CTTTTCTGGCCCC** ( 2 )  
AACCC**CTAAGGAGCCCC** ( 2 )  
CCCC**CTCCTAGGCCCCC** ( 2 )  
    CCCC**CTACCAGGGCCTCA** ( 2 )  
    CCCC**TTGGAGGCCACTA**  
    CCCC**CCCCGTGGCCCCCT**  
    CCCC**ACCCCTGGGCCCT**  
    CCCC**CTAACGCGCCTCCG**

**ACCCCTTAGTGCCCCC**  
**ACCCCATTTACCCCCC**  
**GTCCCCCTCCCGGCC**  
**CCCCCTCACGGGCC**  
 GTATCCCGGTGTATGCGA  
 GCGGAACCGGCTAGGAAT  
 GGGCCCCAGAATCCGG

**Zif268 sites** (One-step selection; E-value=3.0e-06)

TGTACT**TGCGTGGGTGTGG**\* ( 2 )  
 ATGCTTGTCGCT**TACGTGGGCGG** ( 2 )  
 CAGCCT**TGCGTGGGAGGTT**\*  
 TGGACAT**TGCGTAGGCGG**\*  
 CCGCG**TGTGTGGGCGGAA**\*  
 TTGCC**CCACGTGGGCGTG**\*  
 CTCGC**ACGTGTGGGCGTC**\*  
 ACTAT**CCACGTGGGCGTG**\*

**ZnFp53 sites** (E-value=1.7e-045). The Sequence logo for Znf53 in Figure 2 is the reverse complement of the overrepresented motifs in these sequences

**ACGTGTCCGTCAGACGGG**  
**AGCGTGTCCCTCAGTCCG**  
 TG**ACGTGGCCTGTC**ACTC  
 GACGTGGCC**GGATGTCCG**  
 AG**CTCGTGTCC**ATGATCA  
 GACGTGCC**GGCTATCCC**  
**GACATGTCCACGCC**CTAG  
 TA**AGCGTGTCCG**TAGCGG  
 CCCCCGAC**ACGTGTCC**TA\*  
**GGCGTGTCCG**CCTGTTA  
**ACCGTGTCCAG**CTTTAG  
**CCGCGTGTCCG**TAAAGGG  
**GTCGTGTCCC**ATGGTCG  
**GTCGTGTCC**TTGCACGGG  
 AG**TGCGTGTCC**TGGTGCT  
**AGCGTGTCC**TGGTCTGCT  
**GACGTGTCCG**GATTTCCC  
 GGT**GACGTGTCC**TGGGCA  
**GCGTGTCCG**CAGCCTGT  
**ATCGTGTCCG**CTCACCTG

**LAG-1 sites** (E-value=1.4e-023). The Sequence logo for LAG-1 in Figure 3 is the reverse complement of the overrepresented motifs in these sequences. 12 of 17 sequences contain the identified LAG-1 motif.

TGTGAGAA**TTCCCACGGT** ( 2 )  
**GAGTTCCCACGGT**CGACA\* ( 3 )  
 GG**TCACTTTCCCACGGT** ( 3 )  
 TCAACT**TTTCCC**ACTGA\* ( 3 )

**CCTTTCCCACGGTTACCC\* (3)**  
 AGTTGTTTTTCTCACGGT (2)  
     **CAGTTCCCACGATCCGC\***  
     **GATTTTCCCACGTGTGGC\***  
     **CATTTCCCACGCTCAGA\* (2)**  
     **TCATTCCCACGGTAGCAG\***  
     **CTCATTCCCACGGTCCAG\***  
 TCAACTTTTTCCCACCTG\*  
 CTTACGGCTCTGACCGG  
 GGTATGCAATCGATAGAG  
 GTCTGACCATGTCCTTCC  
 ATCCGATGTGTTGATCGC  
 CCCGCGGACACGAACGGT

**Dorsal sites** (E-value = 5.5e-058). The Sequence logo for Dorsal in Figure 2 is the reverse complement of the overrepresented motifs in these sequences. 32 of 35 sequences contain the identified Dorsal motif.

CCACCACGGGGAATTCCC  
 AGGCACAGAGGGGAATTCCC  
 CCCACCACGGGGAATTCCC (3)  
 CTGTGGACAGGGATTTCCT  
 ATAGCCAGAGGGATTTCCT  
 CCGGATTCTGGGATTTCCT  
 TTTTCGCGGGGGTTTCCT  
     **ATCCGGCGGGGAAAACCC**  
     **CGCGTACCGGGAAAACCC**  
 GGTGCGTCTGGGAAAACCC  
 TAATCACGGGGGAAAACCC  
 GGTGCGTCTGGGAAAACCC (2)  
 GGTGTGGCGTGGAAAACCC  
     **CCACCAGACGGAATTCCC**  
 GCCATGTACCAGGAATTCCC  
 TCGTATACTGGGAAAACCC  
 CGCCTGCGCTGGAAAACCC  
 ACCTCGCCTGGAAAACCC  
     **CGGTGCCTTGGGATTCCC**  
 ACCTGCTCTGGGAATTTCC (2)  
 CCTACCTCGGAGAATTCCC  
     **CAGTGAAC TGGGAAAACCC**  
 CCTGGTAGCCGGAAAACCC  
     **CCCTAGCGGGGTTTCCCC**  
 TGTTCACCCGGGGTTTCCC  
 AACCTGGAGCGGAAAACCC (2)  
 ACTGCATCACGGGATTCCC (2)  
     **TGGTAGAATTCCCATGGT\***  
 TCAATCGGAGGGGAAAACCC  
 ACCCAGCTTGGGGAATCC  
 TCGTCACGGTGGTTTCCC

CATCGGTTT**GGGGTTTCCC**  
GCCATGCTATCGGCCGCG  
CACCCCATCAGAATCCTC  
CGAACCGTTAGCAGCTTAC

**Paired site** (E-value = 3.0e-028). 22 of 32 sequences contain the identified Paired motif.

**AATTCGTCACGGTTGATG**  
**GATTCGTCACGCTTGCTT**  
TGATTT**CGTTACGGTCTG**  
**CGATTAGTCACAGTGCCA**  
CT**AATTCGTTCCGCTCCC** ( 4 )  
CC**GATTCGTTCCACTACC**  
TT**AATCTTTCCGCTCCT**  
CC**GATTCGTTCCTCTACC**  
ACA**ATTCGCTACGGTGGT**  
CC**GATTCGACCCAGTCAC**  
CC**GATTAGTCTCGGTTCA**  
CC**GCTTCGTCACGCTATG**  
CT**GATTTGATACGCTTCG**  
CATAT**CCGTCACGGTGTT**  
**AAGAACGTCACGGTTCAC**  
CT**CGCTCGTCACGGTTGG**  
ACA**ATCTCTACTGTGGT**  
**CACTAGTTACTGTACCGC\***  
**CGTTTCTATAGGCTGCGT\***  
**AAGAACGTCCCGTTTCAC**  
ATA**AATCTGACCGGTGGG\***  
**TCATACGGCCCCTTTCTC**  
GCGGTACAGTATGTCCCA ( 2 )  
TGAGTTATTATGGCGGGG  
AGTGATTGTATGGTATAC  
AACCTGTGCTAGAGTACC  
AGTAAAGACCGTGCTGCC  
CAAGCTGAGCCCAAATG  
TCTTATTTGTCAGTAGGA  
CGGGCGGCTCGGATTAAT ( 2 )  
GGAATACTCTGAAAACAC  
GCCCCGCTGCAGAATTAA

**Runt/Bgb sites** (Two step selection; E-value = 1.1e-067) The Sequence logo for Runt in Figure 2 is the reverse complement of the overrepresented motifs in these sequences.

Sequences prior to counterselection

**TAGCCGCAGATTGACTGC**  
GATCTACAGGCGCTATGA

TCTCGGACGCAGAGTACG  
AAACTGTCCCACCCCTAC  
CACGCTATACTGCAACAC  
ACATGTATACTTTGAGAG  
AGCTACTCCTGGGAGAAT  
ACTGGTATATTAGTGCGG

Sequences after counterselection

**CAAACCGCAAT**CCTCGCC ( 2 )  
AAGTTCC**AAACCGCAAGC**  
GGTAGCCT**TAACCGCAAGT**\*  
ACT**TAACCGCAA**AGGATG ( 2 )  
AATA**ACCGCAA**ACTACCC ( 3 )  
AAA**ACCACA**AGCGCTCCT  
ATA**ACCGCAGG**CTCTAC  
CTCGAAA**ACCGCAGC**CT\*  
CTGAA**ACCGCAGT**TTTCGG  
TAA**ACCGCAGG**TTCCAGC  
AAGCT**TAACCGCAGA**AGTG  
CT**TAACCGCAGC**GCTATTC  
ACCC**CAGTAACCACAAGT**\*  
CT**AAACCACAGC**TCCCCG  
CT**CAACCGCAAGG**ACGAC  
AC**CCAACCACAAA**AGGTG  
ACCG**CAAAGCCACAATC**\* ( 2 )  
AAC**GACCACAAGT**CCTTG

**Odd sites**

1.5 mM 3-AT (E-value=4.3e-031)

**GCTACTGGT**CCTTAGGATCT  
CT**GCTACTGTA**ATGGTAAC  
**GCTACCGGT**TCCTTACAGA  
**GCTACCGGA**AGTCATCGTA  
**GGATCTGTT**TGTTTCGGTG  
GAG**GCTACTGT**CCTTGCGGG  
**GCTACTGCT**TAGTCTTGGT  
**GCTACCGGA**CTAGTTACCC  
AG**GCTTCTGAA**ATTCCAGA  
**GCTACTGG**ACCCACCTAG  
**GCTACTGGC**GGGGCAACTC  
**GCTACTGGA**CTGTTGTCGC  
**GCTACCGAT**GCTCACTCC  
GAG**GATCCGGA**AGCAACG  
GGTCCTTCCGT**GCTACTGGC**  
**GCTACTGGT**GTCCTTAGT  
**GCTACTTGT**CACGGTCCGA  
TG**GCTACCGAG**CATGAGCG  
**GCTACTGCA**AGCGGTGCGTA

**ACTACCGTTTAGTTGGCG**  
**GACTACTGGAAGCCTGGT**  
**CGCTTCCGGA AACTACCG**  
**GGGATCCGTTGGAGCGAT**

2.5 mM 3-AT (E-value=9.5e-43)

**GCTACCGTTTACCCGGG**  
**GCTACTGGTCTTAGGATCT ( 2 )**  
**TGCTACTGTGTAATGCGC**  
**TGCTACTGGAAGTTGGTC**  
**CGCTACTGTTGTGTGTGG**  
**GCTTCTGTATTGTTGCGA**  
**TGGCTACTGCTGCCACC**  
**TTGCTACTGTACCCGGGG**  
**GCTACCGTGTGACTCGGA**  
**GCTACTGTAGGCGAACAA**  
**GCTACCGTAGACGCTCGG**  
**GCTACCGTGTGTACCGCA**  
**AGCTACCGGAGCCCTAAG**  
**GCTATCTGGTGAAGTTG**  
**GCTACCGGAAGTTCCTAG**  
**GCTACCGTTATGTGTCGTCG**  
**GCTACTGATTCCCCCTTTA**  
**GCTACTGATTGCGGAAGCA**  
**GCTTCCGGA AAGGCGTG**  
**GCTACTGGTGCTGCACCC**  
**GGCTACTGGTAACAGAGT**  
**GGGCTACCGGGGAATTC**  
**GCTACCGTGAAGTTGTTGT**  
**GCTACCGGACGGTCCCTC**  
**GGATCCGTATGAGTGCCTC**

5 mM 3-AT (E-value=3.2e-049)

**GCTACCGGTTTCCTTACAGA**  
**CGCTACCGAATTTAAGGG**  
**GCTACCGTATACTTTCCA**  
**GCGCTACTGTTTGGGGTG**  
**GCTACTGTTTTCTGTCACC**  
**GCTACTGGTAAAACCAGT**  
**GCTACTGTTGCGTGCAAGG**  
**TGCTACTGGACAAAATCG**  
**TGCTACTGTTCACTCGGG ( 3 )**  
**TGCTACTGGAAGTTGGTC**  
**TGCTACTGGAAGGGGTGA**  
**AGCTACTGTATCAGTGGT ( 3 )**  
**GCTACTGTTTACGCATGGG**  
**TGCTACCGTAGCGACGAG**  
**GCTACTGGTCTTAGGATCT**

TGCTACTGTGCAATGCGG  
TGCTACTGTGGATGAGCG  
TGCTACTGTGTAATGCGC ( 3 )  
CGGCTACTGTGCAGCTAG  
GCTACTGTGCAGTTGCTG  
CGGCTACTGTATACGTCC  
GTGCTACTGTAAGCTCAG  
GTGCTACCGTTTGTTCGG  
GGA TAGGCTGTCTACCC  
GACACATCCTCGGCGGCT  
GGCCTAGGGAAAGTCTGT  
GCCCCGAGGAGCATAAAG
