# Supplementary material
Source: PubMed Central journal article supplement (PMC1435991)
Supplement: NIHMS5491-supplement-SupTable_3.pdf [file NIHMS5491-supplement-SupTable_3.pdf]

Supplementary Table 3

**Search results using a PWM for Odd built in Target Explorer.** Segments in the *D. melanogaster* genome were required to contain two Odd sites within a window of 300 bp and a PWM score threshold of  $\geq 7.5$  for each site. This search identified a list of 1789 segments throughout the genome. This list was refined by requiring the presence of two Odd sites above the same PWM threshold in corresponding segments of the *D. pseudoobscura* genome. Finally binding sites within exons or more than 20 kb from the nearest gene were removed from the list. 130 segments met these criteria. The score of the Odd sites is the sum of the score of the best pair of sites in each segment divided by the maximum possible score (10.16). Position corresponds to the *Drosophila melanogaster* genome sequence release 3.

*odd* is a primary pair-rule gene that is required for segmentation, head development and central nervous system (CNS) development during embryogenesis<sup>1-4</sup>. This list includes genes required for segmentation (*nkd*, *gsb*, *slp1*, *prd*, *h*), head development (*Gsc*, *ems*, *lab*, *oc*), and CNS development (*sc*, *ac*, *SoxN*). Based on genetic analysis, at least five of these genes are likely to be directly regulated by Odd<sup>3-5</sup>: three pair rule genes (*h*, *prd*, and *slp1*) and two proneural genes (*sc* and *ac*). Some previously identified genetic targets of Odd<sup>3,6</sup>, including *engrailed* and *wingless*, were not recovered in our genomic search using the Odd PWM. These omissions may reflect our stringent search parameters. Both *engrailed* and *wingless* have individual Odd binding sites within 5 kb of their transcriptional start sites that are conserved between the *D. melanogaster* and *D. pseudoobscura* (*data not shown*). More accurate CRM predictions should be possible using a combination of PWMs for multiple factors involved in a common regulatory network, such as the pair-rule genes<sup>7,8</sup>.

| Score of Odd sites | Chr. | Position of first Odd site | Gene A         | Segment position relative to A | Distance to Transcription Start Site (bp) | Gene B         | Segment position relative to B | Distance to Transcription Start Site (bp) |
|--------------------|------|----------------------------|----------------|--------------------------------|-------------------------------------------|----------------|--------------------------------|-------------------------------------------|
| 1.97               | X    | 17073340                   | <i>B-H2</i>    | 3'                             | 27800                                     |                |                                |                                           |
| 1.97               | 2R   | 20109481                   | <i>gsb</i>     | 3'                             | 3763                                      | <i>gol</i>     | 3'                             | 18409/11762                               |
| 1.97               | 3R   | 4157251                    | <i>CG7443</i>  | 3'                             | 7179                                      | <i>CG9603</i>  | 3'                             | 9527                                      |
| 1.97               | 3R   | 12227143                   | <i>ss</i>      | intron                         | 2280                                      |                |                                |                                           |
| 1.96               | 3R   | 2493214                    | <i>lab</i>     | intron                         | 11099                                     |                |                                |                                           |
| 1.96               | X    | 8530931                    | <i>Lim1</i>    | intron                         | 13843                                     |                |                                |                                           |
| 1.96               | 3L   | 18187778                   | <i>CheA75a</i> | 5'                             | 13198                                     |                |                                |                                           |
| 1.95               | 2R   | 4127672                    | <i>CG8197</i>  | 5'                             | 5001                                      | <i>ana</i>     | 5'                             | 2176                                      |
| 1.95               | 3L   | 18970954                   | <i>nkd</i>     | intron                         | 23256                                     |                |                                |                                           |
| 1.95               | X    | 13643881                   | <i>CG11072</i> | 5'                             | 11599                                     | <i>CG32606</i> | 3'                             | 1882                                      |
| 1.95               | X    | 18282867                   | <i>Bx</i>      | intron                         | 17243/14429                               |                |                                |                                           |
| 1.95               | 3L   | 11327535                   | <i>CG6163</i>  | 5'                             | 5118                                      |                |                                |                                           |
| 1.95               | 3R   | 6480770                    | <i>hth</i>     | 5'                             | 16366                                     |                |                                |                                           |
| 1.95               | 3R   | 3152555                    | <i>CG10029</i> | 5'                             | 9645                                      | <i>CG31496</i> | 5'                             | 18399                                     |
| 1.95               | 2L   | 14418526                   | <i>CG3474</i>  | 5'                             | 11243                                     | <i>CG15283</i> | 3'                             | 14442                                     |
| 1.95               | X    | 7287275                    | <i>CG32720</i> | 5'                             | 10009                                     |                |                                |                                           |

|      |    |          |         |        |             |               |    |            |
|------|----|----------|---------|--------|-------------|---------------|----|------------|
| 1.95 | X  | 8384268  | oc      | intron | 5328        |               |    |            |
| 1.94 | 2R | 13626166 | CG30115 | 5'     | 811         |               |    |            |
| 1.93 | X  | 160065   | sc      | 3'     | 6567        | <i>l(1)sc</i> | 5' | 7096       |
| 1.92 | 3R | 21907920 | dys     | intron | 3712        |               |    |            |
| 1.92 | 2R | 4770073  | CG10459 | 3'     | 1802        | <i>dap</i>    | 5' | 2883       |
| 1.92 | 2R | 9499021  | phyl    | 5'     | 2960        | CG17388       | 5' | 6944       |
| 1.92 | 2L | 15262288 | CG15261 | 5'     | 9175        | CG15263       | 5' | 824        |
| 1.92 | 3L | 553243   | CG17090 | intron | 29544/26543 |               |    |            |
| 1.89 | 3R | 9716184  | E5      | 5'     | 16264       | <i>ems</i>    | 5' | 11416      |
| 1.82 | 2L | 16388914 | CG5888  | intron | 37635       |               |    |            |
| 1.81 | 2L | 8810494  | SoxN    | 5'     | 7362        |               |    |            |
| 1.8  | 2R | 17198073 | a       | intron | 17531/17089 |               |    |            |
| 1.8  | 3L | 710829   | CG13896 | 5'     | 18626       | CG13897       | 3' | 8920       |
| 1.8  | 3R | 20789396 | CG13647 | 3'     | 2555        | CG31422       | 3' | 25147      |
| 1.79 | 3L | 16437084 | CG33158 | intron | 68411       |               |    |            |
| 1.79 | X  | 8406035  | oc      | 5'     | 16439       | CG12772       | 5' | 10025      |
| 1.79 | 3L | 20601963 | CG32431 | 5'     | 4317        |               |    |            |
| 1.79 | 2L | 15326224 | esg     | 3'     | 14275       | CG15258       | 3' | 13449      |
| 1.78 | 3R | 12019746 | sra     | intron | 7072        |               |    |            |
| 1.78 | 2R | 2256768  | pk      | intron | 45164/8604  |               |    |            |
| 1.78 | 3R | 21836710 | m2      | 5'     | 4153        | HLHm3         | 5' | 92         |
| 1.78 | X  | 17065733 | B-H2    | 3'     | 20193       |               |    |            |
| 1.78 | X  | 124671   | y       | 3'     | 10724       | ac            | 5' | 2798       |
| 1.78 | X  | 1321046  | CG14796 | 5'     | 6102        |               |    |            |
| 1.78 | 3R | 5114769  | CG8454  | 3'     | 21999       | CG8861        | 3' | 39474/5015 |
| 1.78 | 2L | 5450620  | CG31647 | 5'     | 9203        | CG6634        | 5' | 3236       |
| 1.77 | 3L | 12387146 | toe     | intron | 3069        |               |    |            |
| 1.77 | 2L | 15077733 | CG15270 | 3'     | 24003       | CG15269       | 5' | 9937       |
| 1.77 | 3L | 2522454  | Spn     | intron | 12452       |               |    |            |
| 1.76 | 3L | 22533345 | CG6914  | 3'     | 9698        |               |    |            |
| 1.76 | 2L | 4350753  | CG15429 | 3'     | 5209        | <i>Traf1</i>  | 5' | 13806      |
| 1.76 | 2R | 4126236  | CG8197  | 5'     | 3565        | <i>ana</i>    | 5' | 3612       |
| 1.76 | 2L | 12070805 | CG14947 | 3'     | 5111        | <i>prd</i>    | 3' | 4522/3444  |
| 1.76 | 3R | 13330528 | CG31190 | intron | 876         |               |    |            |
| 1.76 | 3R | 11056313 | mRpS10  | 3'     | 906/820     | CG6535        | 3' | 11570      |
| 1.75 | 3R | 19142388 | pnt     | intron | 20153/11914 |               |    |            |
| 1.75 | 2L | 14432503 | CG15283 | intron | 465         |               |    |            |
| 1.75 | 2L | 17491891 | Dhc36C  | intron | 12341       |               |    |            |
| 1.75 | 3R | 27835883 | CG2053  | 5'     | 17578       |               |    |            |
| 1.75 | 3R | 24372095 | CG14063 | 3'     | 2644        |               |    |            |
| 1.75 | 2L | 8907731  | CG15867 | 5'     | 335         |               |    |            |
| 1.75 | 3R | 17655621 | Gr93a   | 3'     | 6432        | CG13416       | 5' | 1970       |
| 1.75 | X  | 8409695  | CG12772 | 5'     | 6365        |               |    |            |
| 1.75 | 3R | 22717622 | T48     | intron | 20801       |               |    |            |
| 1.74 | 2R | 10946734 | sli     | intron | 7845        |               |    |            |
| 1.74 | 3R | 13983718 | CG14316 | 3'     | 5861        | CG14315       | 5' | 789        |

|      |    |          |                |        |             |                  |    |            |
|------|----|----------|----------------|--------|-------------|------------------|----|------------|
| 1.74 | X  | 15278472 | CG32584        | 3'     | 28205       |                  |    |            |
| 1.74 | 2R | 16008812 | <i>hbn</i>     | 5'     | 4359        | CG15649          | 3' | 8663       |
| 1.74 | 2L | 5254918  | <i>tkv</i>     | intron | 9006        |                  |    |            |
| 1.74 | 2L | 15299975 | <i>nht</i>     | 5'     | 1984        | <i>esg</i>       | 5' | 11974      |
| 1.73 | 2L | 14372370 | <i>eIB</i>     | intron | 17540       |                  |    |            |
| 1.73 | 3R | 25321433 | <i>Trc8</i>    | 5'     | 2548        | CG2014           | 5' | 9500       |
| 1.73 | 3L | 13907610 | CG32137        | intron | 19478/19477 |                  |    |            |
| 1.73 | 2R | 14873689 | <i>Obp56h</i>  | 5'     | 5601        |                  |    |            |
| 1.73 | 3L | 6734508  | CG32392        | 5'     | 11733       | <i>vvl</i>       | 5' | 15181/8148 |
| 1.72 | 3L | 8630244  | <i>h</i>       | 5'     | 4425        |                  |    |            |
| 1.72 | 2R | 9989803  | CG10249        | 5'     | 13860       | CG10253          | 3' | 7223       |
| 1.72 | X  | 6932312  | CG32729        | 3'     | 2207        | CG9650           | 5' | 1140       |
| 1.72 | 2L | 591812   | <i>Gsc</i>     | intron | 4540        |                  |    |            |
| 1.72 | X  | 20232340 | CG15455        | 3'     | 18661       | CG15454          | 5' | 5229       |
| 1.72 | 3L | 15122159 | CG7011         | 5'     | 9656        |                  |    |            |
| 1.72 | 2R | 848020   | <i>ap</i>      | intron | 17681       |                  |    |            |
| 1.72 | 2L | 12624482 | <i>nub</i>     | 3'     | 17264       |                  |    |            |
| 1.72 | 2R | 2470747  | CG1701         | intron | 2235        |                  |    |            |
| 1.71 | 2R | 18683619 | <i>retn</i>    | intron | 7439        |                  |    |            |
| 1.71 | 3L | 20591496 | CG32431        | 5'     | 14784       |                  |    |            |
| 1.71 | 3L | 7922305  | <i>exex</i>    | 3'     | 14584       | RNaseX25         | 5' | 7819       |
| 1.71 | X  | 11513842 | <i>dy</i>      | 5'     | 4509        | <i>Karl</i>      | 5' | 5661       |
| 1.71 | 3L | 13265462 | <i>Acp70A</i>  | 3'     | 6259        |                  |    |            |
| 1.7  | 2L | 8848506  | CG32986        | 5'     | 6532        |                  |    |            |
| 1.7  | 2L | 3826483  | <i>slp1</i>    | 3'     | 8234        | <i>slp2</i>      | 5' | 2928       |
| 1.69 | 2R | 1690306  | <i>Vha16</i>   | intron | 3724/2977   |                  |    |            |
| 1.64 | 3R | 17248719 | <i>lbl</i>     | intron | 2090        |                  |    |            |
| 1.62 | 3L | 16713314 | <i>Nrt</i>     | 5'     | 1640        |                  |    |            |
| 1.6  | 3L | 19613099 | CG8780         | intron | 521         |                  |    |            |
| 1.6  | 3L | 8981081  | <i>Doc2</i>    | 5'     | 3131        | <i>Doc1</i>      | 5' | 19006      |
| 1.6  | 2L | 7356176  | <i>Wnt6</i>    | 3'     | 13047       | <i>Wnt10</i>     | 5' | 10817      |
| 1.59 | 3R | 4152688  | CG7443         | 3'     | 2616        | CG9603           | 3' | 14090      |
| 1.59 | 3L | 12437330 | CG10663        | 5'     | 1694        | CG10660          | 3' | 10305      |
| 1.58 | 2R | 10887316 | <i>tun</i>     | 5'     | 8678        | <i>Poxn</i>      | 3' | 11184      |
| 1.58 | 3L | 502848   | <i>klar</i>    | intron | 18370       |                  |    |            |
| 1.57 | 3R | 3154983  | CG10029        | 5'     | 12073       | CG31496          | 5' | 15971      |
| 1.57 | 2R | 15184841 | <i>18w</i>     | 3'     | 9618        |                  |    |            |
| 1.57 | 2L | 8852440  | CG32986        | 5'     | 2598        |                  |    |            |
| 1.57 | X  | 14689532 | CG9030         | 5'     | 3418        | <i>eag</i>       | 5' | 12738      |
| 1.57 | 3R | 16845088 | <i>Rlip</i>    | intron | 1645        |                  |    |            |
| 1.57 | 3R | 12562470 | <i>Ubx</i>     | 5'     | 2104        |                  | 3' | 14659/9656 |
| 1.56 | 3R | 24381227 | CG14063        | 3'     | 11776       | <i>fkh</i>       | 3' | 18944      |
| 1.56 | 2L | 20346069 | <i>Ugt37a1</i> | 5'     | 2360        | CG16798          | 3' | 6028       |
| 1.55 | 3L | 7897471  | CG8268         | 3'     | 1567        | <i>exex</i>      | 5' | 10250      |
| 1.55 | 2R | 873539   | <i>ap</i>      | 5'     | 7838        | <i>l(2)09851</i> | 5' | 19860/4490 |
| 1.55 | 2L | 10795834 | CG31869        | 5'     | 2340        | CG6508           | 5' | 15698      |

|      |    |          |                |        |            |              |    |            |
|------|----|----------|----------------|--------|------------|--------------|----|------------|
| 1.55 | 3R | 15490545 | <i>ort</i>     | 3'     | 5058       | CG7432       | 5' | 2934       |
| 1.55 | 3R | 17253878 | <i>lbl</i>     | 5'     | 3069       | <i>lbe</i>   | 3' | 9128       |
| 1.55 | 3L | 12394551 | <i>toe</i>     | 5'     | 4336       |              |    |            |
| 1.55 | 3R | 10421211 | <i>stumps</i>  | intron | 3008/1395  |              |    |            |
| 1.54 | X  | 7282988  | CG32720        | 5'     | 5722       |              |    |            |
| 1.54 | 3L | 16890459 | CG9665         | intron | 60         |              |    |            |
| 1.54 | 3L | 12889583 | CG32115        | 5'     | 18390      |              |    |            |
| 1.53 | X  | 2154224  | CG14045        | 5'     | 9788       | CG12496      | 3' | 13447/2441 |
| 1.52 | 3R | 17775673 | <i>Eip93F</i>  | 5'     | 16639      |              |    |            |
| 1.52 | 3R | 21607770 | CG31093        | 5'     | 2212       | CG5024       | 5' | 18413      |
| 1.52 | 2L | 15999265 | <i>beat-1c</i> | intron | 20644      |              |    |            |
| 1.52 | X  | 7874749  | CG2120         | intron | 108        |              |    |            |
| 1.51 | 3R | 6871365  | CG4695         | intron | 1653       |              |    |            |
| 1.51 | 2L | 11442500 | <i>salm</i>    | 5'     | 8026       |              |    |            |
| 1.51 | X  | 20387452 | <i>run</i>     | 3'     | 20596      | CG1324       | 3' | 20923      |
| 1.51 | X  | 19988339 | CG1504         | 5'     | 3868       | CG1631       | 5' | 11953      |
| 1.51 | 2L | 16479848 | <i>Tpr2</i>    | intron | 10222/4998 |              |    |            |
| 1.5  | 3L | 13450203 | CG10741        | intron | 5831/2992  |              |    |            |
| 1.5  | 2L | 702374   | <i>ds</i>      | intron | 14259      |              |    |            |
| 1.49 | 3R | 13904260 | CG14317        | 5'     | 2598       |              |    |            |
| 1.49 | 2R | 3091987  | CG14762        | 5'     | 17332      | <i>Optix</i> | 5' | 393        |
| 1.49 | 2R | 13765541 | CG15071        | 3'     | 5187       | CG18604      | 5' | 138        |

1. Coulter, D.E. *et al.* Molecular analysis of odd-skipped, a zinc finger encoding segmentation gene with a novel pair-rule expression pattern. *EMBO J* **9**, 3795-3804 (1990).
2. Coulter, D.E. & Wieschaus, E. Gene activities and segmental patterning in *Drosophila*: analysis of odd-skipped and pair-rule double mutants. *Genes Dev* **2**, 1812-1823 (1988).
3. Saulier-Le Drean, B., Nasiadka, A., Dong, J. & Krause, H.M. Dynamic changes in the functions of *Odd-skipped* during early *Drosophila* embryogenesis. *Development* **125**, 4851-4861 (1998).
4. Skeath, J.B., Panganiban, G., Selegue, J. & Carroll, S.B. Gene regulation in two dimensions: the proneural achaete and scute genes are controlled by combinations of axis-patterning genes through a common intergenic control region. *Genes Dev* **6**, 2606-2619 (1992).
5. Jaynes, J.B. & Fujioka, M. Drawing lines in the sand: even skipped *et al.* and parasegment boundaries. *Dev Biol* **269**, 609-622 (2004).
6. Mullen, J.R. & DiNardo, S. Establishing parasegments in *Drosophila* embryos: roles of the odd-skipped and naked genes. *Dev Biol* **169**, 295-308 (1995).
7. Berman, B.P. *et al.* Computational identification of developmental enhancers: conservation and function of transcription factor binding-site clusters in *Drosophila melanogaster* and *Drosophila pseudoobscura*. *Genome Biol* **5**, R61 (2004).
8. Schroeder, M.D. *et al.* Transcriptional control in the segmentation gene network of *Drosophila*. *PLoS Biol* **2**, E271 (2004).
